# Supplementary material for: Quantifying the Effect of Financial Burden on Health-Related Quality of Life among Patients with Non-Hodgkin’s Lymphomas
Source: PubMed Central journal article supplement (PMC7698092; doi:10.3390/cancers12113325), 2020-11-11
Supplement: cancers-12-03325-s001.pdf [file cancers-12-03325-s001.pdf]

Article

# Quantifying the Effect of Financial Burden on Health-Related Quality of Life among Patients with Non-Hodgkin's Lymphomas

Richard Huan Xu <sup>1,2</sup>, Eliza Lai-yi Wong <sup>1,2</sup>, Yi Su <sup>3</sup>, Hongyu Zhang <sup>4</sup>, Wei Zhang <sup>5</sup> and Dong Dong <sup>1,2,6,\*</sup>

<sup>1</sup> Jockey Club School of Public Health and Primary Care, Faculty of Medicine, The Chinese University of Hong Kong, Hong Kong SAR, China; richardhxu@cuhk.edu.hk (R.H.X.); lywong@cuhk.edu.hk (E.L.W.)

<sup>2</sup> Centre for Health Systems and Policy Research, The Chinese University of Hong Kong, Hong Kong SAR, China

<sup>3</sup> Department of Health Affairs, Jinling Hospital, School of Medicine, Nanjing University, Nanjing 210000, China; sy\_njzy@126.com

<sup>4</sup> Department of Hematology, Peking University Shenzhen Hospital, Shenzhen, Guangdong, 518000 China; hongyuzhang@pkusz.com

<sup>5</sup> Department of Hematology, Peking Union Medical College Hospital, Beijing, 100730 China; vv1223@vip.sina.com

<sup>6</sup> Shenzhen Research Institute, The Chinese University of Hong Kong, Shenzhen, 518000 Guangdong, China

\* Correspondence: dongdong@cuhk.edu.hk; Tel.: +852-2252-8461; Fax: +852-2606-3500

Received: date; Accepted: date; Published: date

Supplementary

Table S1. Multivariable adjusted linear regression models of the relationship between EQ-Index and financial burdens.

| Coefficients:     | Objective |            |         |          |     | Subjective |            |         |          |     |
|-------------------|-----------|------------|---------|----------|-----|------------|------------|---------|----------|-----|
|                   | Estimate  | Std. Error | z value | Pr(> z ) |     | Estimate   | Std. Error | z value | Pr(> z ) |     |
| (Intercept)       | 1.047918  | 0.065629   | 15.967  | < 2e-16  | *** | 1.132332   | 0.062745   | 18.046  | < 2e-16  | *** |
| sex               | -0.02989  | 0.010321   | -2.896  | 0.00378  | **  | -0.03483   | 0.009781   | -3.561  | 0.000369 | *** |
| Age               | -0.00185  | 0.000515   | -3.584  | 0.000338 | *** | -0.00247   | 0.000491   | -5.031  | 4.87E-07 | *** |
| hukou             | 0.005514  | 0.012783   | 0.431   | 0.666229 |     | 0.008737   | 0.01212    | 0.721   | 0.471012 |     |
| edusecondary      | 0.017024  | 0.016173   | 1.053   | 0.292511 |     | 0.006204   | 0.015337   | 0.405   | 0.685825 |     |
| edutertiary       | 0.040839  | 0.017459   | 2.339   | 0.019324 | *   | 0.001857   | 0.016802   | 0.111   | 0.912009 |     |
| duration          | 0.001604  | 0.002083   | 0.77    | 0.44138  |     | 0.002926   | 0.001958   | 1.494   | 0.135183 |     |
| as.factor(treat)3 | -0.07124  | 0.02245    | -3.173  | 0.001507 | **  | -0.05863   | 0.021325   | -2.749  | 0.005975 | **  |
| as.factor(treat)4 | 0.033394  | 0.022158   | 1.507   | 0.13178  |     | 0.026208   | 0.020967   | 1.25    | 0.211319 |     |
| chemo             | -0.0387   | 0.040286   | -0.961  | 0.336726 |     | -0.02649   | 0.038145   | -0.694  | 0.487407 |     |
| radio             | -0.00797  | 0.012878   | -0.619  | 0.536058 |     | -0.02166   | 0.012228   | -1.771  | 0.07649  | .   |
| Moderate burden   | -0.02672  | 0.014685   | -1.819  | 0.068851 | .   | -0.07373   | 0.012408   | -5.942  | 2.81E-09 | *** |
| Severe burden     | -0.04412  | 0.011714   | -3.766  | 0.000166 | *** | -0.15355   | 0.012143   | -12.645 | < 2e-16  | *** |
| Log(scale)        | -1.71805  | 0.02283    | -75.254 | < 2e-16  | *** | -1.77376   | 0.022747   | -77.977 | < 2e-16  | *** |

Table S2. Multivariable adjusted linear regression models of the relationship between physical functioning and financial burdens.

| Coefficients:     | Objective |            |         |          |     | Subjective |            |         |          |     |
|-------------------|-----------|------------|---------|----------|-----|------------|------------|---------|----------|-----|
|                   | Estimate  | Std. Error | t value | Pr(> t ) |     | Estimate   | Std. Error | t value | Pr(> t ) |     |
| (Intercept)       | 103.4344  | 4.35467    | 23.753  | < 2e-16  | *** | 111.3542   | 4.1712     | 26.696  | < 2e-16  | *** |
| sex               | -4.80128  | 0.87457    | -5.49   | 4.76E-08 | *** | -5.45821   | 0.82827    | -6.59   | 6.19E-11 | *** |
| Age               | -0.23458  | 0.04349    | -5.394  | 8.06E-08 | *** | -0.29558   | 0.04133    | -7.151  | 1.38E-12 | *** |
| hukou             | 0.55945   | 1.09854    | 0.509   | 0.610648 |     | 0.88866    | 1.04043    | 0.854   | 0.39318  |     |
| edusecondary      | 0.30931   | 1.39261    | 0.222   | 0.824263 |     | -0.78682   | 1.32059    | -0.596  | 0.5514   |     |
| edutertiary       | 2.41447   | 1.50101    | 1.609   | 0.107934 |     | -1.0484    | 1.4425     | -0.727  | 0.46747  |     |
| duration          | 0.25644   | 0.17323    | 1.48    | 0.139008 |     | 0.42586    | 0.16258    | 2.619   | 0.0089   | **  |
| as.factor(treat)3 | -5.9517   | 1.69299    | -3.515  | 0.000453 | *** | -5.14017   | 1.60766    | -3.197  | 0.00142  | **  |
| as.factor(treat)4 | 2.87658   | 1.69746    | 1.695   | 0.090363 | .   | 1.85079    | 1.60322    | 1.154   | 0.24852  |     |
| chemo             | -6.36473  | 1.517      | -4.196  | 2.89E-05 | *** | -5.73129   | 1.4353     | -3.993  | 6.86E-05 | *** |
| radio             | 1.77794   | 1.08733    | 1.635   | 0.102241 |     | 0.40853    | 1.03156    | 0.396   | 0.69214  |     |
| Moderate burden   | -4.01635  | 1.2411     | -3.236  | 0.00124  | **  | -6.10335   | 1.03402    | -5.903  | 4.47E-09 | *** |
| Severe burden     | -5.32395  | 0.98837    | -5.387  | 8.39E-08 | *** | -14.3978   | 1.02689    | -14.021 | < 2e-16  | *** |

**Table S3.** Multivariable adjusted linear regression models of the relationship between emotional functioning and financial burdens.

| Coefficients:     | objective |            |         |          |     | Subjective |            |         |          |     |
|-------------------|-----------|------------|---------|----------|-----|------------|------------|---------|----------|-----|
|                   | Estimate  | Std. Error | t value | Pr(> t ) |     | Estimate   | Std. Error | t value | Pr(> t ) |     |
| (Intercept)       | 64.40455  | 6.16987    | 10.439  | < 2e-16  | *** | 79.72836   | 5.68555    | 14.023  | < 2e-16  | *** |
| sex               | -3.66056  | 1.23912    | -2.954  | 0.00319  | **  | -4.67769   | 1.12898    | -4.143  | 3.63E-05 | *** |
| Age               | 0.12849   | 0.06162    | 2.085   | 0.03722  | *   | 0.03158    | 0.05634    | 0.561   | 0.57519  |     |
| hukou             | 3.2229    | 1.55646    | 2.071   | 0.03857  | *   | 3.97148    | 1.41816    | 2.8     | 0.00517  | **  |
| edusecondary      | 0.87401   | 1.97311    | 0.443   | 0.65786  |     | -1.47167   | 1.80003    | -0.818  | 0.41373  |     |
| edutertiary       | 3.46112   | 2.12669    | 1.627   | 0.10386  |     | -3.42777   | 1.9662     | -1.743  | 0.08149  | .   |
| duration          | -0.12477  | 0.24544    | -0.508  | 0.6113   |     | 0.04542    | 0.2216     | 0.205   | 0.83764  |     |
| as.factor(treat)3 | -5.50182  | 2.3987     | -2.294  | 0.02196  | *   | -3.57939   | 2.19132    | -1.633  | 0.1026   |     |
| as.factor(treat)4 | 3.12084   | 2.40503    | 1.298   | 0.19462  |     | 2.11052    | 2.18526    | 0.966   | 0.33431  |     |
| chemo             | -1.35092  | 2.14935    | -0.629  | 0.52976  |     | 0.2779     | 1.95639    | 0.142   | 0.88706  |     |
| radio             | 2.57029   | 1.54057    | 1.668   | 0.09546  | .   | 0.41875    | 1.40607    | 0.298   | 0.76589  |     |
| Moderate burden   | -4.45436  | 1.75843    | -2.533  | 0.01141  | *   | -10.8021   | 1.40942    | -7.664  | 3.31E-14 | *** |
| Severe burden     | -4.12957  | 1.40036    | -2.949  | 0.00324  | **  | -24.3851   | 1.3997     | -17.422 | < 2e-16  | *** |

**Table S4.** Multivariable adjusted linear regression models of the relationship between social functioning and financial burdens.

| Coefficients:     | Objective |            |         |          | Subjective |            |         |          |         |     |
|-------------------|-----------|------------|---------|----------|------------|------------|---------|----------|---------|-----|
|                   | Estimate  | Std. Error | t value | Pr(> t ) | Estimate   | Std. Error | t value | Pr(> t ) |         |     |
| (Intercept)       | 54.79279  | 7.57315    | 7.235   | 7.58E-13 | ***        | 81.87328   | 6.13428 | 13.347   | < 2e-16 | *** |
| sex               | 0.85744   | 1.52095    | 0.564   | 0.573011 |            | -0.95241   | 1.21808 | -0.782   | 0.43441 |     |
| Age               | 0.10053   | 0.07563    | 1.329   | 0.184016 |            | -0.06679   | 0.06079 | -1.099   | 0.27208 |     |
| hukou             | -1.48353  | 1.91046    | -0.777  | 0.437565 |            | -0.15029   | 1.53008 | -0.098   | 0.92177 |     |
| edusecondary      | 1.27611   | 2.42187    | 0.527   | 0.598339 |            | -2.48352   | 1.9421  | -1.279   | 0.20118 |     |
| edutertiary       | 8.26745   | 2.61039    | 3.167   | 0.001572 | **         | -3.46491   | 2.12138 | -1.633   | 0.10262 |     |
| duration          | 0.2569    | 0.30127    | 0.853   | 0.393947 |            | 0.57716    | 0.23909 | 2.414    | 0.0159  | *   |
| as.factor(treat)3 | -9.71977  | 2.94427    | -3.301  | 0.000986 | ***        | -6.10581   | 2.36427 | -2.583   | 0.00991 | **  |
| as.factor(treat)4 | 2.96923   | 2.95203    | 1.006   | 0.31467  |            | 1.08865    | 2.35773 | 0.462    | 0.64434 |     |
| chemo             | -9.34978  | 2.6382     | -3.544  | 0.000407 | ***        | -6.60694   | 2.11079 | -3.13    | 0.00178 | **  |
| radio             | 3.99461   | 1.89097    | 2.112   | 0.034821 | *          | 0.16511    | 1.51704 | 0.109    | 0.91335 |     |
| Moderate burden   | -6.19134  | 2.15838    | -2.869  | 0.004185 | **         | -21.4389   | 1.52066 | -14.098  | < 2e-16 | *** |
| Severe burden     | -8.78699  | 1.71886    | -5.112  | 3.62E-07 | ***        | -43.6504   | 1.51017 | -28.904  | < 2e-16 | *** |

**Table S5.** Comparisons between common and Uncommon NHL.

|                    | <b>Common NHL<br/>n=1100</b> | <b>Uncommon NHL<br/>n=449</b> | <b>p-value</b> |
|--------------------|------------------------------|-------------------------------|----------------|
| EQ-Index           | 0.87(0.15)                   | 0.85(0.19)                    | <0.001         |
| Physical function  | 78.25(18.59)                 | 66.08(23.95)                  | <0.001         |
| Emotional function | 66.08(23.95)                 | 66.22(22.65)                  | 0.23           |
| Social function    | 51.29(30.05)                 | 45.25(29.75)                  | <0.001         |
| Subjective burden  |                              |                               |                |
| Low                | 464(42.2)                    | 147(32.7)                     | <0.001         |
| Moderate           | 315(28.6)                    | 122(27.2)                     |                |
| High               | 321(29.2)                    | 180(40.1)                     |                |
| Objective burden   |                              |                               |                |
| Low                | 495(45.0)                    | 162(36.1)                     | 0.001          |
| Moderate           | 194(17.6)                    | 76(16.9)                      |                |
| High               | 411(37.4)                    | 211(47.0)                     |                |

Common NHL: CLL, FL and DLBCL. Uncommon NHL: LPL, MALT, MCL, BL, T-LBL, ENKL, PTCL, and PC-ALCL

**Table S6.** Multivariable adjusted linear regression models of the relationship between HRQoL and financial burdens for patients with common NHL.

|                          | <b>b (95% C.I.)</b>   |                             |                              |                           |
|--------------------------|-----------------------|-----------------------------|------------------------------|---------------------------|
|                          | <b>EQ Index</b>       | <b>Physical Functioning</b> | <b>Emotional Functioning</b> | <b>Social Functioning</b> |
| <b>Objective method</b>  |                       |                             |                              |                           |
| <40%                     | Ref                   | Ref                         | Ref                          | Ref                       |
| 40%~100%                 | -0.04(-0.07~-0.01)*** | -4.75(-7.5~-1.97)***        | -5.39(-9.54~-1.22)*          | -5.37(-10.4~-0.34)*       |
| >100%                    | -0.05(-0.07~-0.02)*** | -3.94(-6.19~-1.68)***       | -5.07(-8.44~-1.71)**         | -8.27(-12.34~-4.19)***    |
| <b>Subjective method</b> |                       |                             |                              |                           |
| Low                      | Ref                   | Ref                         | Ref                          | Ref                       |
| Moderate                 | -0.07(-0.1~-0.05)***  | -6.43(-8.73~-4.13)***       | -11.26(-14.51~-8.01)***      | -20.99(-24.54~-17.45)***  |
| High                     | -0.15(-0.18~-0.13)*** | -14.22(-16.55~-11.87)***    | -27.35(-30.66~-24.04)***     | -43.25(-46.86~-39.64)***  |

**Table S7.** Multivariable adjusted linear regression models of the relationship between HRQoL and financial burdens for patients with uncommon NHL.

|                          | <b>b (95% C.I.)</b>  |                             |                              |                           |
|--------------------------|----------------------|-----------------------------|------------------------------|---------------------------|
|                          | <b>EQ Index</b>      | <b>Physical Functioning</b> | <b>Emotional Functioning</b> | <b>Social Functioning</b> |
| <b>Objective method</b>  |                      |                             |                              |                           |
| <40%                     | Ref                  | Ref                         | Ref                          | Ref                       |
| 40%~100%                 | 0.02(-0.04~0.09)     | -1.55(-6.47~3.36)           | -1.68(-7.97~4.6)             | -7.53(-15.48~0.43)        |
| >100%                    | -0.03(-0.08~0.02)    | -7.28(-11.06~-3.49)***      | -1.92(-6.76~2.9)             | -8.21(-14.33~-2.09)**     |
| <b>Subjective method</b> |                      |                             |                              |                           |
| Low                      | Ref                  | Ref                         | Ref                          | Ref                       |
| Moderate                 | -0.07(-0.12~-0.1)*** | -4.97(-9.2~-0.75)*          | -9.88(-15.14~-4.61)***       | -22.48(-28.08~-16.88)***  |
| High                     | -0.15(-0.2~-0.1)***  | -13.91(-17.97~-9.84)***     | -19.24(-24.3~-14.18)***      | -44.54(-49.93~-39.15)***  |
